# Supplementary material
Source: Springer Nature journal article supplement (https://www.springermedizin.de/resource/supplementary/12889_2012_4391_MOESM2_ESM.pdf/9492374)
Supplement: MOESM2 [file 9492374]

| Age at sexual debut | Lifetime sexual partners |            |            |           |            |     |
|---------------------|--------------------------|------------|------------|-----------|------------|-----|
|                     | MALES                    |            |            |           |            |     |
|                     | N° (%)                   | 1          | 2          | 3         | ≥ 4        | NR* |
|                     |                          | N° (%)     | N° (%)     | N° (%)    | N° (%)     |     |
| 11                  | 4 (0.3)                  |            |            | 1 (0.1)   | 3 (0.2)    | 0   |
| 12                  | 17 (1.4)                 |            | 2 (0.2)    | 1 (0.1)   | 14 (1.1)   | 0   |
| 13                  | 61 (5.0)                 | 8 (0.6)    | 10 (0.8)   | 6 (0.5)   | 30 (2.4)   | 7   |
| 14                  | 255 (20.8)               | 68 (5.5)   | 38 (3.1)   | 27 (2.2)  | 114 (9.3)  | 8   |
| 15                  | 261 (21.3)               | 58 (4.7)   | 50 (4.1)   | 41 (3.3)  | 90 (7.3)   | 22  |
| > 15                | 623 (50.8)               | 195 (15.9) | 105 (8.6)  | 91 (7.4)  | 184 (15.0) | 48  |
| NR*                 | 241                      |            |            |           |            |     |
| FEMALES             |                          |            |            |           |            |     |
| 11                  | 3 (0.1)                  |            |            |           | 3 (0.1)    | 0   |
| 12                  | 26 (0.9)                 |            | 3 (0.1)    | 2 (0.1)   | 19 (0.7)   | 2   |
| 13                  | 129 (4.7)                | 24 (0.9)   | 25 (0.9)   | 23 (0.8)  | 54 (1.9)   | 3   |
| 14                  | 486 (17.7)               | 162 (5.9)  | 93 (3.4)   | 70 (2.5)  | 158 (5.7)  | 3   |
| 15                  | 686 (25.0)               | 287 (10.4) | 143 (5.2)  | 91 (3.3)  | 148 (5.4)  | 17  |
| > 15                | 1384 (50.4)              | 690 (25.1) | 316 (11.5) | 169 (6.1) | 209 (7.6)  | 24  |
| NR*                 | 260                      |            |            |           |            |     |

Green = low risk, yellow = medium risk, red = high risk

\* NR = non-responders
